# Supplementary material for: Framing health taxes: a scoping review
Source: PubMed Central journal article supplement (PMC10565303; doi:10.1136/bmjgh-2023-012055), 2023-10-09
Supplement: bmjgh-2023-012055supp003.pdf [file bmjgh-2023-012055supp003.pdf]

|                    |           |   |    |                    |           |                |                       |           |              |
|--------------------|-----------|---|----|--------------------|-----------|----------------|-----------------------|-----------|--------------|
| Scotland           | 1         | 1 | 3% | 2020-2022          | 19        | 47.50%         | Framing theory (Gar   | 1         | 4.00%        |
| Philippines        | 1         | 1 | 3% | 2015-2019          | 10        | 25.00%         | Framing Theory (criti | 1         | 4.00%        |
| India              | 1         | 1 | 3% | 2010-2014          | 8         | 20.00%         | agenda-setting (light | 1         | 4.00%        |
| Colombia           | 1         | 1 | 3% | 2005-2009          | 3         | 7.50%          | Framing (communica    | 1         | 4.00%        |
| Ireland            | 1         | 1 | 3% | <b>Grand Total</b> | <b>40</b> | <b>100.00%</b> | <b>Grand Total</b>    | <b>25</b> | <b>#####</b> |
| Malaysia           | 1         | 1 | 3% |                    |           |                |                       |           |              |
| Uganda             | 1         | 1 | 3% |                    |           |                |                       |           |              |
| Nigeria            | 1         | 1 | 3% |                    |           |                |                       |           |              |
| Finland            | 1         | 1 | 3% |                    |           |                |                       |           |              |
| <b>Grand Total</b> | <b>43</b> |   |    |                    |           |                |                       |           |              |

| Row Labels                                            | Count     | Percent        |
|-------------------------------------------------------|-----------|----------------|
| Health Promotion International                        | 3         | 7.50%          |
| PLoS One                                              | 2         | 5.00%          |
| Social Science & Medicine                             | 2         | 5.00%          |
| Public Health Nutrition                               | 2         | 5.00%          |
| American Journal of Public Health                     | 2         | 5.00%          |
| Tobacco Control                                       | 2         | 5.00%          |
| Health Policy and Planning                            | 2         | 5.00%          |
| Dissertation                                          | 1         | 2.50%          |
| Journal of Public Health Research                     | 1         | 2.50%          |
| Journal of Immigrant and Minority Health              | 1         | 2.50%          |
| Global Public Health                                  | 1         | 2.50%          |
| Critical Public Health                                | 1         | 2.50%          |
| Globalization and Health                              | 1         | 2.50%          |
| Drug and Alcohol Review                               | 1         | 2.50%          |
| Health Behavior & Policy Review                       | 1         | 2.50%          |
| Journal of Public Health Management and Health Policy | 1         | 2.50%          |
| Journal of Studies on Alcohol and Drugs               | 1         | 2.50%          |
| The Milbank Quarterly                                 | 1         | 2.50%          |
| Policy Sciences                                       | 1         | 2.50%          |
| BMC Public Health                                     | 1         | 2.50%          |
| Public Works and Management Policy                    | 1         | 2.50%          |
| American Journal of Preventive Medicine               | 1         | 2.50%          |
| Global Health Action                                  | 1         | 2.50%          |
| Translational Behavioral Medicine                     | 1         | 2.50%          |
| Versita                                               | 1         | 2.50%          |
| JMIR Public Health and Surveillance                   | 1         | 2.50%          |
| European Journal of Public Health                     | 1         | 2.50%          |
| Public Health                                         | 1         | 2.50%          |
| Health Systems & Reform                               | 1         | 2.50%          |
| American Journal of Health Promotion                  | 1         | 2.50%          |
| Journal of Epidemiology and Community Health          | 1         | 2.50%          |
| <b>Grand Total</b>                                    | <b>40</b> | <b>100.00%</b> |

| Organization Type      | Count         |       |     |             |
|------------------------|---------------|-------|-----|-------------|
| NGO                    | 32.00         | 32.00 | 80% | Avg<br>6.00 |
| industry associate     | 30.00         | 30.00 | 75% |             |
| corporate entity       | 27.00         | 27.00 | 68% |             |
| ministry/dept of he    | 26.00         | 26.00 | 65% |             |
| legislative politician | 21.00         | 21.00 | 53% |             |
| media                  | 20.00         | 20.00 | 50% |             |
| university             | 16.00         | 16.00 | 40% |             |
| executive branch p     | 15.00         | 15.00 | 38% |             |
| treasury/ministry of   | 15.00         | 15.00 | 38% |             |
| multilateral           | 10.00         | 10.00 | 25% |             |
| professional health    | 8.00          | 8.00  | 20% |             |
| Private philanthrop    | 5.00          | 5.00  | 13% |             |
| judicial politician    | 4.00          | 4.00  | 10% |             |
| regulatory agency      | 1.00          | 1.00  | 3%  |             |
| Chamber of Comm        | 1.00          | 1.00  | 3%  |             |
| medical experts        | 1.00          | 1.00  | 3%  |             |
| City officials (gene   | 1.00          | 1.00  | 3%  |             |
| public relations firm  | 1.00          | 1.00  | 3%  |             |
| social influencer/cc   | 1.00          | 1.00  | 3%  |             |
| economists private     | 1.00          | 1.00  | 3%  |             |
| residents              | 1.00          | 1.00  | 3%  |             |
| advocacy groups        | 1.00          | 1.00  | 3%  |             |
| retailers              | 1.00          | 1.00  | 3%  |             |
| think tanks            | 1.00          | 1.00  | 3%  |             |
| <b>Grand Total</b>     | <b>240.00</b> |       |     |             |
| <b>Pro-tax MF</b>      | <b>Count</b>  |       |     |             |
| Care/ham               | 35            | 35    | 88% |             |
| faimess/cheating       | 18            | 18    | 45% |             |
| liberty/oppresion      | 17            | 17    | 43% |             |
| sanctity/degraded      | 10            | 10    | 25% |             |
| authority/subversic    | 7             | 7     | 18% |             |
| loyalty/betrayal       | 5             | 5     | 13% |             |
| <b>Grand Total</b>     | <b>92</b>     |       |     |             |
| <b>Anti-tax MF</b>     | <b>Count</b>  |       |     |             |
| faimess/cheating       | 26            | 26    | 65% |             |
| liberty/oppresion      | 21            | 21    | 53% |             |

| Tax Type                             | Count     |       |     |
|--------------------------------------|-----------|-------|-----|
| excise                               | 30        | 30.00 | 75% |
| value added/wholesale/gross receipts | 7         | 7.00  | 18% |
| retail transaction                   | 2         | 2.00  | 5%  |
| import duty                          | 1         | 1.00  | 3%  |
| vendor privilege                     | 1         | 1.00  | 3%  |
| <b>Grand Total</b>                   | <b>41</b> |       |     |

| Outcome                   | Count     |    |     |
|---------------------------|-----------|----|-----|
| Old tax modified          | 14        | 14 | 35% |
| New tax created           | 14        | 14 | 35% |
| Contestation (unresolved) | 12        | 12 | 30% |
| New tax rejected          | 5         | 5  | 13% |
| New tax modified          | 2         | 2  | 5%  |
| (blank)                   |           |    |     |
| <b>Grand Total</b>        | <b>47</b> |    |     |

| CPA                                           | Count     |       |     |
|-----------------------------------------------|-----------|-------|-----|
| shaping the evidence -> Lobbying              | 29        | 29.00 | 73% |
| shaping the evidence -> shaping research      | 8         | 8.00  | 20% |
| constituency building -> promoting or spor    | 8         | 8.00  | 20% |
| constituency building -> financial or non-fir | 7         | 7.00  | 18% |
| contributing to health policy consultations   | 6         | 6.00  | 15% |
| partnership of voluntary agreements with c    | 5         | 5.00  | 13% |
| (blank)                                       |           |       |     |
| <b>Grand Total</b>                            | <b>63</b> |       |     |

| Misc                     | Count     |    |     |
|--------------------------|-----------|----|-----|
| Jingle or slogan         | 11        | 11 | 28% |
| series of events         | 9         | 9  | 23% |
| social media influencers | 1         | 1  | 3%  |
| wearables                | 1         | 1  | 3%  |
| celebrity endorsement    | 1         | 1  | 3%  |
| petitions                | 1         | 1  | 3%  |
| <b>Grand Total</b>       | <b>24</b> |    |     |

0%

|                     |           |    |     |
|---------------------|-----------|----|-----|
| Care/harm           | 18        | 18 | 45% |
| authority/subversic | 10        | 10 | 25% |
| loyalty/betrayal    | 8         | 8  | 20% |
| sanctity/degraded   | 4         | 4  | 10% |
| <b>Grand Total</b>  | <b>87</b> |    |     |

| <b>Pro-tax Value</b> | <b>Count</b> |    |     |
|----------------------|--------------|----|-----|
| welfare              | 34           | 34 | 85% |
| Equity               | 21           | 21 | 53% |
| Efficiency           | 21           | 21 | 53% |
| liberty              | 16           | 16 | 40% |
| security             | 11           | 11 | 28% |
| <b>Grand Total</b>   | <b>103</b>   |    |     |

| <b>Anti-tax Value</b> | <b>Count</b> |    |     |
|-----------------------|--------------|----|-----|
| Efficiency            | 21           | 21 | 53% |
| liberty               | 21           | 21 | 53% |
| Equity                | 19           | 19 | 48% |
| welfare               | 19           | 19 | 48% |
| security              | 12           | 12 | 30% |
| <b>Grand Total</b>    | <b>92</b>    |    |     |

| <b>Frame Type</b>             | <b>Count</b> |    |     |
|-------------------------------|--------------|----|-----|
| Policy action (surface level) | 30           | 30 | 75% |
| Institutional (intermediate)  | 10           | 10 | 25% |
| Metacultural (deep/broad)     | 4            | 4  | 10% |
| (blank)                       |              |    |     |
| <b>Grand Total</b>            | <b>44</b>    |    |     |

| <b>Argument For</b>                   | <b>Count</b> |    |     |
|---------------------------------------|--------------|----|-----|
| Reduces suffering and premature death | 33           | 33 | 83% |
| lucrative for governments             | 22           | 22 | 55% |
| cost containment/savings              | 19           | 19 | 48% |
| pro-poor policy                       | 14           | 14 | 35% |
| education                             | 9            | 9  | 23% |
| everyone else is doing it             | 9            | 9  | 23% |
| product reformation                   | 5            | 5  | 13% |
| cheap                                 | 4            | 4  | 10% |
| <b>Grand Total</b>                    | <b>115</b>   |    |     |

| <b>Argument Against</b>             | <b>Count</b> |    |     |
|-------------------------------------|--------------|----|-----|
| threat to industry                  | 25           | 25 | 63% |
| tax on the poor                     | 23           | 23 | 58% |
| hurts/eliminates jobs               | 21           | 21 | 53% |
| better means to end                 | 21           | 21 | 53% |
| narrow and unfair                   | 19           | 19 | 48% |
| meaningless (too small/ineffective) | 18           | 18 | 45% |
| nanny state                         | 17           | 17 | 43% |
| Promote illicit trade               | 5            | 5  | 13% |
| <b>Grand Total</b>                  | <b>149</b>   |    |     |
